# Supplementary material for: High expression of SOMATIC EMBRYOGENESIS RECEPTOR-LIKE KINASE coincides with initiation of various developmental pathways in in vitro culture of Trifolium nigrescens
Source: PubMed Central journal article supplement (PMC4783438; doi:10.1007/s00709-015-0814-5), 2015-04-16
Supplement: 709_2015_814_MOESM2_ESM.pdf [file 709_2015_814_MOESM2_ESM.pdf]

## Electronic Supplementary Material

**For manuscript entitled:** “High expression of *SOMATIC EMBRYOGENESIS RECEPTOR-LIKE KINASE* coincides with initiation of various developmental pathways in *in vitro* culture of *Trifolium nigrescens*”

Submitted to *Protoplasma*

**Authors:** Maria Pilarska<sup>1</sup>, Przemysław Malec<sup>2</sup>, Jan Salaj<sup>3</sup>, Filip Bartnicki<sup>2</sup>, Robert Konieczny<sup>4\*</sup>

<sup>1</sup>The Franciszek Górski Institute of Plant Physiology, Polish Academy of Sciences, Niezapominajek 21, 30-239 Kraków, Poland

<sup>2</sup>Department of Plant Physiology and Biochemistry, Faculty of Biochemistry, Biophysics and Biotechnology, Jagiellonian University, Gronostajowa 7, 30-387 Kraków, Poland

<sup>3</sup>Institute of Plant Genetics and Biotechnology, Slovak Academy of Sciences, Akademicka 2, 950-07 Nitra, Slovak Republic

<sup>4</sup>Department of Plant Cytology and Embryology, Institute of Botany, Jagiellonian University, Gronostajowa 9, 30-387 Kraków, Poland

\*Author for correspondence:

e-mail: [robert.konieczny@uj.edu.pl](mailto:robert.konieczny@uj.edu.pl)

tel/fax: +48 12 66 51 04

**Online Resource 2.** Alignment of the deduced partial amino acid sequence of TnSERK with other plant SERKs: *Medicago truncatula* (Q8GRK2) *Glycine max* (C6ZRV3), *Citrus unshiu* (Q6BE26), *Gossypium hirsutum* (E5Q8K6), *Nicotiana benthamiana* (G0XZA2), *Solanum lycopersicum* (K4BTP4), *Arabidopsis thaliana* SERK1 (Q94AG2), *Arabidopsis thaliana* SERK2 (Q9XIC7), *Oryza japonica* (Q6Z4U4) and *Daucus carota* (O23921)

```

Putative TnSERK 1 LGQLKRFSLRELQVATD TFSNKNILGRGCFKVVYKRLADCSLVAVKRLKEERTPGCELQFQTEVEMISMAVHRNLLRLR
MtSERK1 [Q8GRK2] 1 LGQLKRFSLRELQVATD TFSNKNILGRGCFKVVYKRLADCSLVAVKRLKEERTPGCELQFQTEVEMISMAVHRNLLRLR
GmSERK1 [C6ZRV3] 1 LGQLKRFSLRELQVATD SFSNKNILGRGCFKVVYKRLADCSLVAVKRLKEERTPGCELQFQTEVEMISMAVHRNLLRLR
CuSERK1 [Q6BE26] 1 LGQLKRFSLRELQVATD SFSNKNILGRGCFKVVYKRLADCSLVAVKRLKEERTPGCELQFQTEVEMISMAVHRNLLRLR
GhSERK1 [E5Q8K6] 1 LGQLKRFSLRELQVATD SFSNKNILGRGCFKVVYKRLADCSLVAVKRLKEERTPGCELQFQTEVEMISMAVHRNLLRLR
NbSERK1 [G0XZA2] 1 LGQLKRFSLRELQVATD SFSNKNILGRGCFKVVYKRLADCSLVAVKRLKEERTPGCELQFQTEVEMISMAVHRNLLRLR
SlSERK1 [K4BTP4] 1 LGQLKRFSLRELQVATD SFSNKNILGRGCFKVVYKRLADCSLVAVKRLKEERTPGCELQFQTEVEMISMAVHRNLLRLR
AthSERK1 [Q94AG2] 1 LGQLKRFSLRELQVATD SFSNKNILGRGCFKVVYKRLADCSLVAVKRLKEERTPGCELQFQTEVEMISMAVHRNLLRLR
AthSERK2 [Q9XIC7] 1 LGQLKRFSLRELQVATD SFSNKNILGRGCFKVVYKRLADCSLVAVKRLKEERTPGCELQFQTEVEMISMAVHRNLLRLR
OjSERK1 [Q624U4] 1 LGQLKRFSLRELQVATD TFSNKNILGRGCFKVVYKRLADCSLVAVKRLKEERTPGCELQFQTEVEMISMAVHRNLLRLR
DcSERK1 [O23921] 1 LGQLKRFSLRELQVATD TFSNKNILGRGCFKVVYKRLADCSLVAVKRLKEERTPGCELQFQTEVEMISMAVHRNLLRLR
Clustal Consensus 1 *****: * * : *****:*****:*****:*****:*****:*****:*****:*****:*****

```

```

Putative TnSERK 81 GFCMTPTERLLVYPYMANGSVASCLRRPPEQLDLPWPTKRRIALGSARGLSYLHDHCDPKI IHRDVKAANILLDEFEA
MtSERK1 [Q8GRK2] 81 GFCMTPTERLLVYPYMANGSVASCLRRPPEQLDLPWPTKRRIALGSARGLSYLHDHCDPKI IHRDVKAANILLDEFEA
GmSERK1 [C6ZRV3] 81 GFCMTPTERLLVYPYMANGSVASCLRRPPEQLDLPWPTKRRIALGSARGLSYLHDHCDPKI IHRDVKAANILLDEFEA
CuSERK1 [Q6BE26] 81 GFCMTPTERLLVYPYMANGSVASCLRRPPEQLDLPWPTKRRIALGSARGLSYLHDHCDPKI IHRDVKAANILLDEFEA
GhSERK1 [E5Q8K6] 81 GFCMTPTERLLVYPYMANGSVASCLRRPPEQLDLPWPTKRRIALGSARGLSYLHDHCDPKI IHRDVKAANILLDEFEA
NbSERK1 [G0XZA2] 81 GFCMTPTERLLVYPYMANGSVASCLRRPPEQLDLPWPTKRRIALGSARGLSYLHDHCDPKI IHRDVKAANILLDEFEA
SlSERK1 [K4BTP4] 81 GFCMTPTERLLVYPYMANGSVASCLRRPPEQLDLPWPTKRRIALGSARGLSYLHDHCDPKI IHRDVKAANILLDEFEA
AthSERK1 [Q94AG2] 81 GFCMTPTERLLVYPYMANGSVASCLRRPPEQLDLPWPTKRRIALGSARGLSYLHDHCDPKI IHRDVKAANILLDEFEA
AthSERK2 [Q9XIC7] 81 GFCMTPTERLLVYPYMANGSVASCLRRPPEQLDLPWPTKRRIALGSARGLSYLHDHCDPKI IHRDVKAANILLDEFEA
OjSERK1 [Q624U4] 81 GFCMTPTERLLVYPYMANGSVASCLRRPPEQLDLPWPTKRRIALGSARGLSYLHDHCDPKI IHRDVKAANILLDEFEA
DcSERK1 [O23921] 79 GFCMTPTERLLVYPYMANGSVASCLRRPPEQLDLPWPTKRRIALGSARGLSYLHDHCDPKI IHRDVKAANILLDEFEA
Clustal Consensus 77 *****:*****:*****:*****:*****:*****:*****:*****:*****:*****:*****:*****:*****

```

```

Putative TnSERK 161 VVGD FGLAKLMDYKD THVTTAVRCTI CHIAP EYLLSTCKSSERTD VFCY GIMLLELITCQRAF DLARLANDDDVMLLDWVK
MtSERK1 [Q8GRK2] 161 VVGD FGLAKLMDYKD THVTTAVRCTI CHIAP EYLLSTCKSSERTD VFCY GIMLLELITCQRAF DLARLANDDDVMLLDWVK
GmSERK1 [C6ZRV3] 161 VVGD FGLAKLMDYKD THVTTAVRCTI CHIAP EYLLSTCKSSERTD VFCY GIMLLELITCQRAF DLARLANDDDVMLLDWVK
CuSERK1 [Q6BE26] 161 VVGD FGLAKLMDYKD THVTTAVRCTI CHIAP EYLLSTCKSSERTD VFCY GIMLLELITCQRAF DLARLANDDDVMLLDWVK
GhSERK1 [E5Q8K6] 161 VVGD FGLAKLMDYKD THVTTAVRCTI CHIAP EYLLSTCKSSERTD VFCY GIMLLELITCQRAF DLARLANDDDVMLLDWVK
NbSERK1 [G0XZA2] 161 VVGD FGLAKLMDYKD THVTTAVRCTI CHIAP EYLLSTCKSSERTD VFCY GIMLLELITCQRAF DLARLANDDDVMLLDWVK
SlSERK1 [K4BTP4] 161 VVGD FGLAKLMDYKD THVTTAVRCTI CHIAP EYLLSTCKSSERTD VFCY GIMLLELITCQRAF DLARLANDDDVMLLDWVK
AthSERK1 [Q94AG2] 161 VVGD FGLAKLMDYKD THVTTAVRCTI CHIAP EYLLSTCKSSERTD VFCY GIMLLELITCQRAF DLARLANDDDVMLLDWVK
AthSERK2 [Q9XIC7] 161 VVGD FGLAKLMDYKD THVTTAVRCTI CHIAP EYLLSTCKSSERTD VFCY GIMLLELITCQRAF DLARLANDDDVMLLDWVK
OjSERK1 [Q624U4] 161 VVGD FGLAKLMDYKD THVTTAVRCTI CHIAP EYLLSTCKSSERTD VFCY GIMLLELITCQRAF DLARLANDDDVMLLDWVK
DcSERK1 [O23921] 159 VVGD FGLAKLMDYKD THVTTAVRCTI CHIAP EYLLSTCKSSERTD VFCY GIMLLELITCQRAF DLARLANDDDVMLLDWVK
Clustal Consensus 150 *****:*****:*****:*****:*****:*****:*****:*****:*****:*****:*****:*****

```

```

Putative TnSERK 241 CLLKERKLEMLVDPDLQNTNYEAEVQLIQVALLCTQCS PMDRPKMS EVVRMLECDGLAERWD EWQKVEVLRQEV ELAPH
MtSERK1 [Q8GRK2] 241 CLLKERKLEMLVDPDLQNTNYEAEVQLIQVALLCTQCS PMDRPKMS EVVRMLECDGLAERWD EWQKVEVLRQEV ELAPH
GmSERK1 [C6ZRV3] 241 CLLKERKLEMLVDPDLQNTNYEAEVQLIQVALLCTQCS PMDRPKMS EVVRMLECDGLAERWD EWQKVEVLRQEV ELAPH
CuSERK1 [Q6BE26] 241 CLLKERKLEMLVDPDLQNTNYEAEVQLIQVALLCTQCS PMDRPKMS EVVRMLECDGLAERWD EWQKVEVLRQEV ELAPH
GhSERK1 [E5Q8K6] 241 CLLKERKLEMLVDPDLQNTNYEAEVQLIQVALLCTQCS PMDRPKMS EVVRMLECDGLAERWD EWQKVEVLRQEV ELAPH
NbSERK1 [G0XZA2] 241 CLLKERKLEMLVDPDLQNTNYEAEVQLIQVALLCTQCS PMDRPKMS EVVRMLECDGLAERWD EWQKVEVLRQEV ELAPH
SlSERK1 [K4BTP4] 241 CLLKERKLEMLVDPDLQNTNYEAEVQLIQVALLCTQCS PMDRPKMS EVVRMLECDGLAERWD EWQKVEVLRQEV ELAPH
AthSERK1 [Q94AG2] 241 CLLKERKLEMLVDPDLQNTNYEAEVQLIQVALLCTQCS PMDRPKMS EVVRMLECDGLAERWD EWQKVEVLRQEV ELAPH
AthSERK2 [Q9XIC7] 241 CLLKERKLEMLVDPDLQNTNYEAEVQLIQVALLCTQCS PMDRPKMS EVVRMLECDGLAERWD EWQKVEVLRQEV ELAPH
OjSERK1 [Q624U4] 241 CLLKERKLEMLVDPDLQNTNYEAEVQLIQVALLCTQCS PMDRPKMS EVVRMLECDGLAERWD EWQKVEVLRQEV ELAPH
DcSERK1 [O23921] 239 SLLKERKLEMLVDPDLQNTNYEAEVQLIQVALLCTQCS PMDRPKMS EVVRMLECDGLAERWD EWQKVEVLRQEV ELAPH
Clustal Consensus 229 *****:*****:*****:*****:*****:*****:*****:*****:*****:*****:*****:*****

```

```

Putative TnSERK 321 P NSDWIWDSTENLH AVELS
MtSERK1 [Q8GRK2] 321 P NSDWIWDSTENLH AVELS
GmSERK1 [C6ZRV3] 321 P NSDWIWDSTENLH AVELS
CuSERK1 [Q6BE26] 321 P NSDWIWDSTENLH AVELS
GhSERK1 [E5Q8K6] 321 P NSDWIWDSTENLH AVELS
NbSERK1 [G0XZA2] 321 P NSDWIWDSTENLH AVELS
SlSERK1 [K4BTP4] 321 P NSDWIWDSTENLH AVELS
AthSERK1 [Q94AG2] 321 P NSDWIWDSTENLH AVELS
AthSERK2 [Q9XIC7] 321 P NSDWIWDSTENLH AVELS
OjSERK1 [Q624U4] 321 P NSDWIWDSTENLH AVELS
DcSERK1 [O23921] 319 R NSDWIWDSTENLH AVELS
Clustal Consensus *:::*** ***:***

```
