# Supplementary material for: High expression of SOMATIC EMBRYOGENESIS RECEPTOR-LIKE KINASE coincides with initiation of various developmental pathways in in vitro culture of Trifolium nigrescens
Source: Protoplasma. 2015 Apr 16;253:345–55. doi: 10.1007/s00709-015-0814-5 (PMC4783438; doi:10.1007/s00709-015-0814-5)

## Electronic Supplementary Material

**For manuscript entitled:** “High expression of *SOMATIC EMBRYOGENESIS RECEPTOR-LIKE KINASE* coincides with initiation of various developmental pathways in *in vitro* culture of *Trifolium nigrescens*”

**Submitted to** *Protoplasma*

**Authors:** Maria Pilarska<sup>1</sup>, Przemysław Malec<sup>2</sup>, Jan Salaj<sup>3</sup>, Filip Bartnicki<sup>2</sup>, Robert Konieczny<sup>4\*</sup>

<sup>1</sup>The Franciszek Górski Institute of Plant Physiology, Polish Academy of Sciences, Niezapominajek 21, 30-239 Kraków, Poland

<sup>2</sup>Department of Plant Physiology and Biochemistry, Faculty of Biochemistry, Biophysics and Biotechnology, Jagiellonian University, Gronostajowa 7, 30-387 Kraków, Poland

<sup>3</sup>Institute of Plant Genetics and Biotechnology, Slovak Academy of Sciences, Akademicka 2, 950-07 Nitra, Slovak Republic

<sup>4</sup>Department of Plant Cytology and Embryology, Institute of Botany, Jagiellonian University, Gronostajowa 9, 30-387 Kraków, Poland

\*Author for correspondence:

e-mail: [robert.konieczny@uj.edu.pl](mailto:robert.konieczny@uj.edu.pl)

tel/fax: +48 12 664 51 04

**Online Resource 3.** Somatic embryos of zygotic-like morphology (a) and embryo-like structures induced from zygotic embryos of *T. nigrescens* (b). Bar represents 500µm.

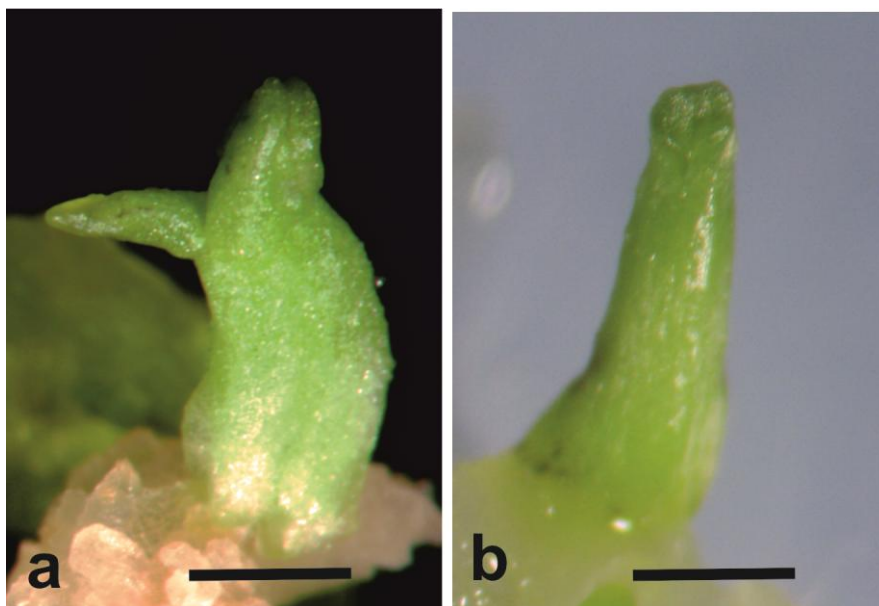

Supplement: Supplementary file 3 — (PDF 218 kb) [file 709_2015_814_MOESM3_ESM.pdf]
